# Supplementary material for: Quantification of Intra-Muscular Adipose Infiltration in Calf/Thigh MRI Using Fully and Weakly Supervised Semantic Segmentation
Source: MDPI journal article supplement (doi:10.3390/bioengineering9070315), 2022-07-14
Supplement: s1 [file s1]

*Supplementary Materials*

# Quantification of Intra-Muscular Adipose Infiltration in Calf/Thigh MRI Using Fully and Weakly Supervised Semantic Segmentation

Rula Amer <sup>1</sup>, Jannette Nassar <sup>1</sup>, Amira Trabelsi <sup>2</sup>, David Bendahan <sup>2</sup>, Hayit Greenspan <sup>1,\*</sup> and Noam Ben-Eliezer <sup>1,3,4,\*</sup>

<sup>1</sup> Department of Biomedical Engineering, Tel Aviv University, Tel Aviv 6139001, Israel; rolaamer@mail.tau.ac.il (R.A.); jannette2210@gmail.com (J.N.)

<sup>2</sup> Center for Magnetic Resonance in Biology and Medicine, Aix Marseille University, 13007 Marseille, France; amira.trabelsi.tn@gmail.com (A.T.); david.bendahan@univ-amu.fr (D.B.)

<sup>3</sup> Sagol School of Neuroscience, Tel-Aviv University, Tel Aviv, Israel

<sup>4</sup> Center for Advanced Imaging Innovation and Research (CAI2R), New York University School of Medicine, New York, NY 10016, USA

\* Correspondence: noambe@tauex.tau.ac.il (N.B.E.); Tel.: +972-3-6409388

**Citation:** Amer, R.; Nassar, J.; Trabelsi, A.; Bendahan, D.; Greenspan, H.; Ben-Eliezer, N. Quantification of Intra-Muscular Adipose Infiltration in Calf/Thigh MRI Using Fully and Weakly Supervised Semantic Segmentation. *Bioengineering* **2022**, *9*, x. <https://doi.org/10.3390/xxxxx>

Academic Editor: Zhen Cheng

Received: 25 May 2022

Accepted: 8 July 2022

Published: date

**Publisher's Note:** MDPI stays neutral with regard to jurisdictional claims in published maps and institutional affiliations.

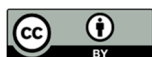

**Copyright:** © 2022 by the authors. Submitted for possible open access publication under the terms and conditions of the Creative Commons Attribution (CC BY) license (<https://creativecommons.org/licenses/by/4.0/>).

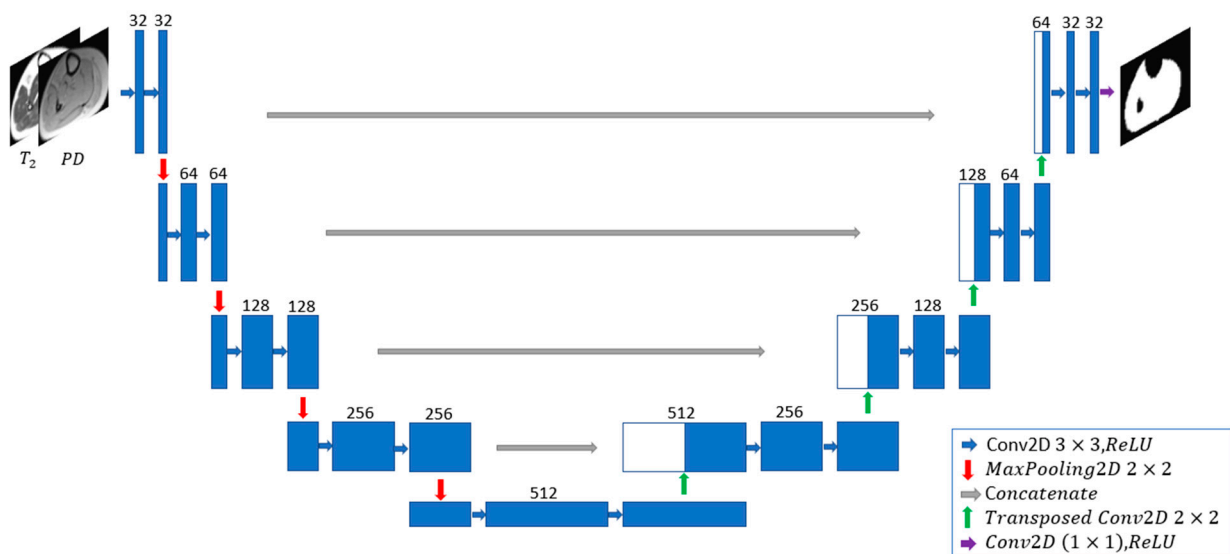

**Figure S1.** The architecture of U-net used for muscle-region segmentation.

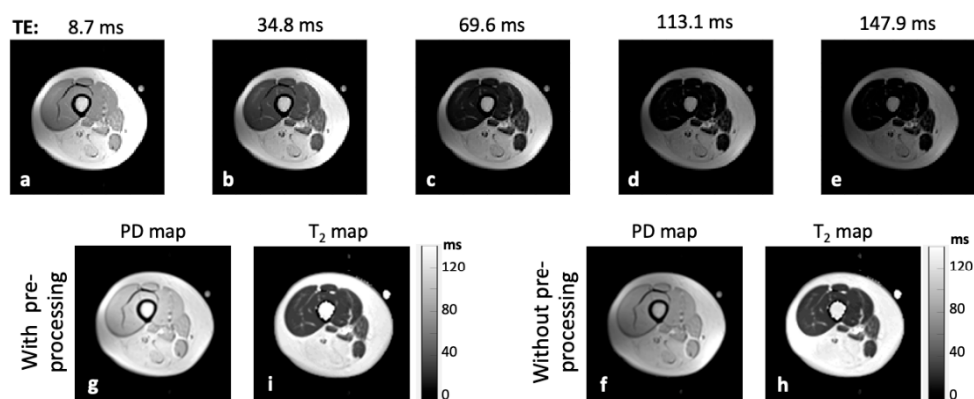

**Figure S2.** Data used for training the deep neural network. (a-e) Five representative raw T<sub>2</sub>-weighted images from 1<sup>st</sup>, 4<sup>th</sup>, 8<sup>th</sup>, 13<sup>th</sup>, and 17<sup>th</sup> echo times (TEs). (f-g) Quantitative proton density maps [A.U.]. (h-i) Quantitative T<sub>2</sub> maps [ms]. Seven different combinations of this data were used as inputs to train the network. (i) T<sub>2</sub> & PD maps w/o pre-processing; (ii) T<sub>2</sub> & PD maps w/ pre-processing; (iii / iv) Unprocessed / processed T<sub>2</sub> maps; (v / vi) Unprocessed / processed PD maps; (vii) Full set of raw T<sub>2</sub>-weighted images (from all TEs).
